# Supplementary material for: Racine, d'Aragon à Vitez
Source: Springer Nature journal article supplement (doi:10.1186/s13601-018-0195-x), 1999-01-01

**Effectiveness of icatibant for treatment of hereditary angioedema attacks is not affected by body weight: findings from the Icatibant Outcome Survey, a cohort observational study**

Supplemental Materials

**Table S1.** Patient BMI and number of icatibant-treated attacks (excluding 2 outlier patients)

| Characteristic                                            | Underweight BMI  | Normal BMI       | Overweight BMI   | Obese BMI        |
|-----------------------------------------------------------|------------------|------------------|------------------|------------------|
| Patients, n (%)                                           | 12               | 152              | 119              | 57               |
| BMI, kg/m <sup>2a</sup>                                   |                  |                  |                  |                  |
| Mean $\pm$ SD                                             | 18.0 $\pm$ 0.5   | 22.2 $\pm$ 1.8   | 26.9 $\pm$ 1.3   | 34.5 $\pm$ 4.1   |
| Median (range)                                            | 18.1 (16.7–18.4) | 22.5 (18.7–25.0) | 26.6 (25.0–29.8) | 33.3 (30.0–46.7) |
| No. of icatibant-treated attacks during enrollment        | 104              | 1271             | 829              | 393              |
| No. of icatibant-treated attacks per patient <sup>b</sup> |                  |                  |                  |                  |
| Mean $\pm$ SD                                             | 8.7 $\pm$ 13.5   | 8.4 $\pm$ 14.6   | 7.0 $\pm$ 11.3   | 6.9 $\pm$ 8.6    |
| Median (range)                                            | 4.0 (1–47)       | 3.5 (1–101)      | 3.0 (1–83)       | 3.0 (1–33)       |

*BMI* body mass index; *SD* standard deviation

<sup>a</sup>At study entry

<sup>b</sup>Attack rate during enrollment.  $P = 0.510$  comparing the normal, overweight, and obese categories. The underweight category was excluded from the comparison due to small sample size

**Table S2.** Treatment of attacks (excluding 2 outlier patients)

|                                                              | Underweight<br>BMI | Normal BMI  | Overweight<br>BMI | Obese BMI              |
|--------------------------------------------------------------|--------------------|-------------|-------------------|------------------------|
| Type of administration, n (%)                                |                    |             |                   |                        |
| n <sup>a</sup>                                               | 103                | 1218        | 792               | 358                    |
| HCP                                                          | 10 (9.7)           | 367 (30.1)  | 148 (18.7)        | 67 (18.7)              |
| Self                                                         | 93 (90.3)          | 851 (69.9)  | 644 (81.3)        | 291 (81.3)             |
| No. of icanitabant injections per attack <sup>a</sup>        |                    |             |                   |                        |
| n                                                            | 103                | 1258        | 826               | 377                    |
| Mean ± SD                                                    | 1.0 ± 0.2          | 1.1 ± 0.3   | 1.1 ± 0.3         | 1.1 ± 0.4              |
| Median (range)                                               | 1 (1–3)            | 1 (1–3)     | 1 (1–3)           | 1 (1–6)                |
| No. of icanitabant injections per attack, n (%) <sup>a</sup> |                    |             |                   |                        |
| n                                                            | 103                | 1258        | 826               | 377                    |
| 1                                                            | 91 (88.3)          | 1064 (84.6) | 687 (83.2)        | 309 (82.0)             |
| 1 + C1-INH rescue medication                                 | 9 (8.7)            | 83 (6.6)    | 85 (10.3)         | 46 (12.2)              |
| 2                                                            | 2 (1.9)            | 98 (7.8)    | 48 (5.8)          | 19 (5.0)               |
| 2 + C1-INH rescue medication                                 | 0                  | 8 (0.6)     | 5 (0.6)           | 0                      |
| 3                                                            | 1 (1.0)            | 3 (0.2)     | 1 (0.1)           | 2 (0.5)                |
| 3 + C1-INH rescue medication                                 | 0                  | 2 (0.2)     | 0                 | 0                      |
| 6                                                            | 0                  | 0           | 0                 | 1 (0.3) <sup>b</sup>   |
| C1-INH rescue medication, n (%)                              |                    |             |                   |                        |
| n                                                            | 104                | 1271        | 829               | 393                    |
| No. of patients used C1-INH rescue                           | 2                  | 29          | 21                | 15                     |
| No. of attacks used C1-INH rescue                            | 9 (8.7)            | 101 (7.9)   | 90 (10.9)         | 47 (12.0) <sup>c</sup> |

*BMI* body mass index; *C1-INH* C1-inhibitor; *HCP* health care provider; *SD* standard deviation

n = number of attacks

<sup>a</sup>Excluding attacks with missing data

<sup>b</sup>One patient experienced an abdominal attack that lasted for 6 days; the patient was treated with one icatibant injection each day, for a total of six injections

<sup>c</sup>One attack was treated with C1-INH, however, the number of icatibant injections used was unknown

**Table S3.** Impact of time to treatment on mean time to resolution and duration of attack (excluding 2 outlier patients)

| Time to treatment                      | Underweight |             | Normal |             | Overweight |             | Obese |             |
|----------------------------------------|-------------|-------------|--------|-------------|------------|-------------|-------|-------------|
|                                        | n           | BMI         | n      | BMI         | n          | BMI         | n     | BMI         |
| Mean ± SD impact on time to resolution |             |             |        |             |            |             |       |             |
| 0 to < 1 h                             | 6           | 15.6 ± 16.7 | 154    | 10.3 ± 12.5 | 148        | 7.9 ± 11.0  | 71    | 5.7 ± 10.9  |
| ≥ 1 h                                  | 6           | 10.1 ± 8.4  | 233    | 15.7 ± 18.1 | 201        | 9.9 ± 12.4  | 88    | 16.2 ± 18.1 |
| P value                                |             | n.a.        |        | 0.006       |            | 0.001       |       | < 0.001     |
| 0 to < 2 h                             | 6           | 15.6 ± 16.7 | 226    | 11.8 ± 13.6 | 193        | 8.4 ± 12.0  | 92    | 7.0 ± 11.7  |
| ≥ 2 h                                  | 6           | 10.1 ± 8.4  | 161    | 16.1 ± 19.2 | 156        | 9.8 ± 11.6  | 67    | 17.8 ± 19.2 |
| P value                                |             | n.a.        |        | 0.174       |            | 0.011       |       | < 0.001     |
| Mean ± SD impact on duration of attack |             |             |        |             |            |             |       |             |
| 0 to < 1 h                             | 6           | 15.8 ± 16.7 | 154    | 10.6 ± 12.5 | 148        | 8.1 ± 11.0  | 71    | 5.9 ± 10.9  |
| ≥ 1 h                                  | 6           | 18.7 ± 12.5 | 233    | 22.5 ± 22.5 | 201        | 14.8 ± 14.2 | 88    | 24.6 ± 21.4 |
| P value                                |             | n.a.        |        | < 0.001     |            | < 0.001     |       | < 0.001     |
| 0 to < 2 h                             | 6           | 15.8 ± 16.7 | 226    | 12.4 ± 13.7 | 193        | 8.9 ± 12.1  | 92    | 7.4 ± 11.9  |
| ≥ 2 h                                  | 6           | 18.7 ± 12.5 | 161    | 25.4 ± 24.6 | 156        | 15.8 ± 13.9 | 67    | 28.4 ± 22.1 |
| P value                                |             | n.a.        |        | < 0.001     |            | < 0.001     |       | < 0.001     |

*BMI* body mass index; *n.a.* not applicable because statistical comparison was not conducted due to small sample sizes; *SD* standard deviation

**Table S4.** Evaluation of factors affecting time to treatment<sup>a</sup>

| Effect (numerator)                                                                                               | Odds ratio | 95% CI     | P value               |
|------------------------------------------------------------------------------------------------------------------|------------|------------|-----------------------|
| Univariate analysis                                                                                              |            |            |                       |
| Attack frequency ( $\geq 10$ attacks/year)                                                                       | 2.48       | —          | < 0.001               |
| BMI ( $\geq 25$ kg/m <sup>2</sup> )                                                                              | 1.77       | —          | 0.012                 |
| Type of administration (HCP)                                                                                     | 0.55       | —          | 0.067                 |
| C1-INH long-term prophylaxis or rescue medication (yes)                                                          | 1.28       | —          | 0.289                 |
| Age at attack ( $\geq 40$ years)                                                                                 | 1.28       | —          | 0.335                 |
| Severity (severe/very severe)                                                                                    | 0.88       | —          | 0.461                 |
| C1-INH rescue medication (yes)                                                                                   | 1.19       | —          | 0.466                 |
| Affected site: abdomen (yes)                                                                                     | 0.93       | —          | 0.582                 |
| Sex (female)                                                                                                     | 1.15       | —          | 0.569                 |
| Affected site: skin (yes)                                                                                        | 1.02       | —          | 0.820                 |
| Affected site: larynx (yes)                                                                                      | 1.05       | —          | 0.821                 |
| Affected site: multiple sites (multiple)                                                                         | 1.03       | —          | 0.902                 |
| C1-INH long-term prophylaxis (yes)                                                                               | 0.99       | —          | 0.989                 |
| Country                                                                                                          |            |            | < 0.0001 <sup>b</sup> |
| Multivariate analysis                                                                                            |            |            |                       |
| BMI ( $\geq 25$ kg/m <sup>2</sup> )                                                                              | 1.71       | 1.06–2.79  | 0.0295                |
| Attack frequency ( $\geq 10$ attacks/year)                                                                       | 2.89       | 1.36–6.14  | 0.006                 |
| Attack frequency and type of administration <sup>c</sup><br>$\geq 10$ attacks/year self vs < 10 attacks/year HCP | 5.81       | 1.08–31.28 | 0.035                 |

*BMI* body mass index; *C1-INH* C1-inhibitor; *CI* confidence interval; *HCP* health care professional

<sup>a</sup>Model of probability that time to first injection < 1 hour

<sup>b</sup>Pr>ChiSq. Overall effect of country on time to treatment

<sup>c</sup>Only significant interactions are shown

**Table S5.** Evaluation of factors affecting time to treatment (excluding 2 outlier patients)<sup>a</sup>

| Effect (numerator)                                              | Odds ratio | 95% CI     | P value               |
|-----------------------------------------------------------------|------------|------------|-----------------------|
| Univariate analysis                                             |            |            |                       |
| Attack frequency ( $\geq 10$ attacks/year)                      | 2.50       | —          | < 0.001               |
| BMI ( $\geq 25$ kg/m <sup>2</sup> )                             | 1.74       | —          | 0.016                 |
| Type of administration (HCP)                                    | 0.56       | —          | 0.077                 |
| C1-INH long-term prophylaxis (yes)                              | 2.50       | —          | 0.112                 |
| Age at attack ( $\geq 40$ years)                                | 1.26       | —          | 0.370                 |
| Severity (severe/very severe)                                   | 0.87       | —          | 0.449                 |
| C1-INH long-term prophylaxis or rescue medication (yes)         | 1.20       | —          | 0.461                 |
| Sex (female)                                                    | 1.20       | —          | 0.460                 |
| C1-INH rescue medication (yes)                                  | 1.14       | —          | 0.618                 |
| Affected site: abdomen (yes)                                    | 0.93       | —          | 0.646                 |
| Affected site: larynx (yes)                                     | 1.06       | —          | 0.804                 |
| Affected site: multiple sites (multiple)                        | 1.05       | —          | 0.829                 |
| Affected site: skin (yes)                                       | 1.00       | —          | 0.981                 |
| Country                                                         |            |            | < 0.0001 <sup>b</sup> |
| Multivariate analysis                                           |            |            |                       |
| BMI ( $\geq 25$ kg/m <sup>2</sup> vs < 25 kg/m <sup>2</sup> )   | 1.69       | 1.03–2.76  | 0.037                 |
| Attack frequency ( $\geq 10$ attacks/year vs < 10 attacks/year) | 2.90       | 1.35–6.23  | 0.006                 |
| Attack frequency and type of administration <sup>c</sup>        |            |            |                       |
| $\geq 10$ attacks/year self vs < 10 attacks/year HCP            | 6.03       | 1.09–33.31 | 0.033                 |

*BMI* body mass index; *C1-INH* C1-inhibitor; *CI* confidence interval; *HCP* health care professional

<sup>a</sup>Model of probability that time to first injection < 1 hour

<sup>b</sup>Pr>ChiSq. Overall effect of country on time to treatment

<sup>c</sup>Only significant interactions are shown

**Table S6.** Evaluation of factors affecting time to resolution<sup>a</sup>

| Effect (numerator)                                                  | Odds ratio | 95% CI     | P value             |
|---------------------------------------------------------------------|------------|------------|---------------------|
| Univariate analysis                                                 |            |            |                     |
| BMI ( $\geq 25$ kg/m <sup>2</sup> )                                 | 1.52       | —          | 0.072               |
| C1-INH long-term prophylaxis or rescue medication (yes)             | 0.64       | —          | 0.064               |
| C1-INH rescue medication (yes)                                      | 0.66       | —          | 0.097               |
| Affected site: skin (yes)                                           | 0.74       | —          | 0.118               |
| Time to first injection ( $\geq 1$ hour)                            | 0.78       | —          | 0.142               |
| Type of administration (HCP)                                        | 1.49       | —          | 0.133               |
| Affected site: abdomen (yes)                                        | 1.27       | —          | 0.257               |
| Affected site: multiple sites (multiple)                            | 0.81       | —          | 0.264               |
| Attack frequency ( $\geq 10$ attacks/year)                          | 1.26       | —          | 0.322               |
| Age at attack ( $\geq 40$ years)                                    | 0.84       | —          | 0.454               |
| Severity (severe/very severe)                                       | 0.92       | —          | 0.561               |
| C1-INH long-term prophylaxis (yes)                                  | 0.73       | —          | 0.550               |
| Affected site: larynx (yes)                                         | 1.11       | —          | 0.634               |
| Sex (female)                                                        | 1.08       | —          | 0.738               |
| Country                                                             |            |            | 0.0191 <sup>b</sup> |
| Multivariate analysis                                               |            |            |                     |
| BMI ( $\geq 25$ kg/m <sup>2</sup> )                                 | 4.46       | 2.24–8.89  | < 0.0001            |
| C1-INH rescue medication (yes)                                      | 0.31       | 0.19–0.5   | < 0.0001            |
| Affected site: skin (yes)                                           | 0.65       | 0.43–1.00  | 0.0488              |
| Type of administration (HCP)                                        | 1.54       | 0.92–2.59  | 0.1006              |
| BMI and type of administration <sup>c</sup>                         |            |            |                     |
| $\geq 25$ kg/m <sup>2</sup> HCP vs < 25 kg/m <sup>2</sup> HCP       | 10.46      | 2.38–45.86 | 0.0002              |
| $\geq 25$ kg/m <sup>2</sup> HCP vs $\geq 25$ kg/m <sup>2</sup> self | 3.62       | 1.36–9.64  | 0.0033              |
| $\geq 25$ kg/m <sup>2</sup> HCP vs < 25 kg/m <sup>2</sup> self      | 6.88       | 2.12–22.39 | 0.0001              |
| BMI and C1-INH rescue medication <sup>c</sup>                       |            |            |                     |



|                                                           |       |            |            |
|-----------------------------------------------------------|-------|------------|------------|
| $\geq 25 \text{ kg/m}^2$ no vs $< 25 \text{ kg/m}^2$ no   | 2.27  | 1.02–5.04  | 0.0398     |
| $\geq 25 \text{ kg/m}^2$ no vs $< 25 \text{ kg/m}^2$ yes  | 14.38 | 4.83–42.83 | $< 0.0001$ |
| $\geq 25 \text{ kg/m}^2$ yes vs $< 25 \text{ kg/m}^2$ yes | 8.77  | 2.22–34.67 | 0.0002     |
| $< 25 \text{ kg/m}^2$ no vs $< 25 \text{ kg/m}^2$ yes     | 6.33  | 2.54–15.76 | $< 0.0001$ |

*BMI* body mass index; *CI-INH* C1-inhibitor; *CI* confidence interval; *HCP* health care provider

<sup>a</sup>Model of probability that time to resolution  $< 5$  hours

<sup>b</sup> $\text{Pr}>\text{ChiSq}$ . Overall effect of country on time to resolution

<sup>c</sup>Only significant interactions are shown

**Table S7.** Evaluation of factors affecting time to resolution (excluding 2 outlier patients)<sup>a</sup>

| Effect (numerator)                                                  | Odds ratio | 95% CI     | P value             |
|---------------------------------------------------------------------|------------|------------|---------------------|
| Univariate analysis                                                 |            |            |                     |
| BMI ( $\geq 25$ kg/m <sup>2</sup> )                                 | 1.57       | —          | 0.053               |
| Affected site: skin (yes)                                           | 0.69       | —          | 0.060               |
| C1-INH rescue medication (yes)                                      | 0.58       | —          | 0.075               |
| C1-INH long-term prophylaxis or rescue medication (yes)             | 0.60       | —          | 0.078               |
| Affected site: abdomen (yes)                                        | 1.39       | —          | 0.114               |
| Type of administration (HCP)                                        | 1.57       | —          | 0.101               |
| Time to first injection ( $\geq 1$ hour)                            | 0.87       | —          | 0.379               |
| Attack frequency ( $\geq 10$ attacks/year)                          | 1.23       | —          | 0.373               |
| Affected site: multiple sites (multiple)                            | 0.87       | —          | 0.446               |
| Age at attack ( $\geq 40$ years)                                    | 0.85       | —          | 0.492               |
| Affected site: larynx (yes)                                         | 1.12       | —          | 0.561               |
| Sex (female)                                                        | 1.06       | —          | 0.802               |
| Severity (severe/very severe)                                       | 0.97       | —          | 0.836               |
| C1-INH long-term prophylaxis (yes)                                  | 0.97       | —          | 0.973               |
| Country                                                             |            |            | 0.0174 <sup>b</sup> |
| Multivariate analysis                                               |            |            |                     |
| BMI ( $\geq 25$ kg/m <sup>2</sup> )                                 | 2.50       | 1.38–4.53  | 0.0024              |
| Type of administration (HCP)                                        | 1.53       | 0.92–2.54  | 0.1044              |
| BMI and type of administration <sup>c</sup>                         |            |            |                     |
| $\geq 25$ kg/m <sup>2</sup> HCP vs $< 25$ kg/m <sup>2</sup> HCP     | 5.90       | 1.56–22.40 | 0.0027              |
| $\geq 25$ kg/m <sup>2</sup> HCP vs $\geq 25$ kg/m <sup>2</sup> self | 3.60       | 1.31–9.89  | 0.0050              |
| $\geq 25$ kg/m <sup>2</sup> HCP vs $< 25$ kg/m <sup>2</sup> self    | 3.82       | 1.32–11.05 | 0.0053              |

*BMI* body mass index; *C1-INH* C1-inhibitor; *CI* confidence interval; *HCP* health care provider

<sup>a</sup>Model of probability that time to resolution  $< 5$  hours

<sup>b</sup> $P_{r>ChiSq}$ . Overall effect of country on time to resolution

<sup>c</sup>Only significant interactions are shown

**Table S8.** Average duration of untreated attacks (excluding 2 outlier patients)

|                                    | Underweight BMI | Normal BMI      | Overweight BMI  | Obese BMI       |
|------------------------------------|-----------------|-----------------|-----------------|-----------------|
| <b>Baseline</b>                    |                 |                 |                 |                 |
| Average duration of attack (hours) |                 |                 |                 |                 |
| n                                  | 12              | 149             | 106             | 40              |
| Mean $\pm$ SD <sup>a</sup>         | 50.7 $\pm$ 22.9 | 40.4 $\pm$ 32.5 | 45.9 $\pm$ 31.5 | 43.9 $\pm$ 34.9 |
| Median (range)                     | 48.0 (6–92)     | 40.0 (0–140)    | 48.0 (0–156)    | 44.1 (0–120)    |
| <b>Follow-up</b>                   |                 |                 |                 |                 |
| Average duration of attack (hours) |                 |                 |                 |                 |
| n                                  | 11              | 76              | 70              | 25              |
| Mean $\pm$ SD <sup>a</sup>         | 34.6 $\pm$ 21.6 | 39.7 $\pm$ 31.1 | 37.6 $\pm$ 30.6 | 44.2 $\pm$ 29.9 |
| Median (range)                     | 36 (0–72)       | 37.5 (0–144)    | 28.7 (0–120)    | 48.0 (0.3–120)  |

*BMI* body mass index; *SD* standard deviation

n = the number of patients

<sup>a</sup>P values comparing average duration of attack at baseline between patients with normal/overweight/obese BMI: P = 0.429 at baseline, P = 0.530 at follow-up

Note: average duration of untreated attacks corresponds to mean of average durations of untreated attacks at the skin, abdomen, larynx, and other sites.

### Figure legends

**Figure S1.** Severity of icanibant-treated attacks by body mass index (BMI). P values comparing severity of attacks (very mild/mild/moderate vs severe/very severe): P = 0.146 for normal vs overweight; P = 0.972 for normal vs obese; P = 0.249 for overweight vs obese. n = number of attacks

**Figure S2.** Site of icanibant-treated attacks by body mass index (BMI). P values comparing frequency of attacks between patients with normal/overweight/obese BMI: P = 0.026 for skin attacks; P = 0.004 for abdominal attacks; P = 0.215 for laryngeal attacks; P = 0.142 for attacks affecting other organs. n = number of attacks

**Figure S3.** Outcomes of attacks treated with icanibant by body mass index (BMI). Analysis included attacks with data for all three outcomes. Boxes depict 25th percentile, median, and 75th percentile. Mean indicated with "o". P values refer to comparisons *versus* normal BMI: time to treatment, P = 0.016 *versus* overweight and P = 0.496 *versus* obese; duration of attack, P < 0.001 *versus* overweight and P = 0.417 *versus* obese; time to resolution, P < 0.001 *versus* overweight and P = 0.178 *versus* obese. Max = maximum value. n = number of attacks

Figure S1.

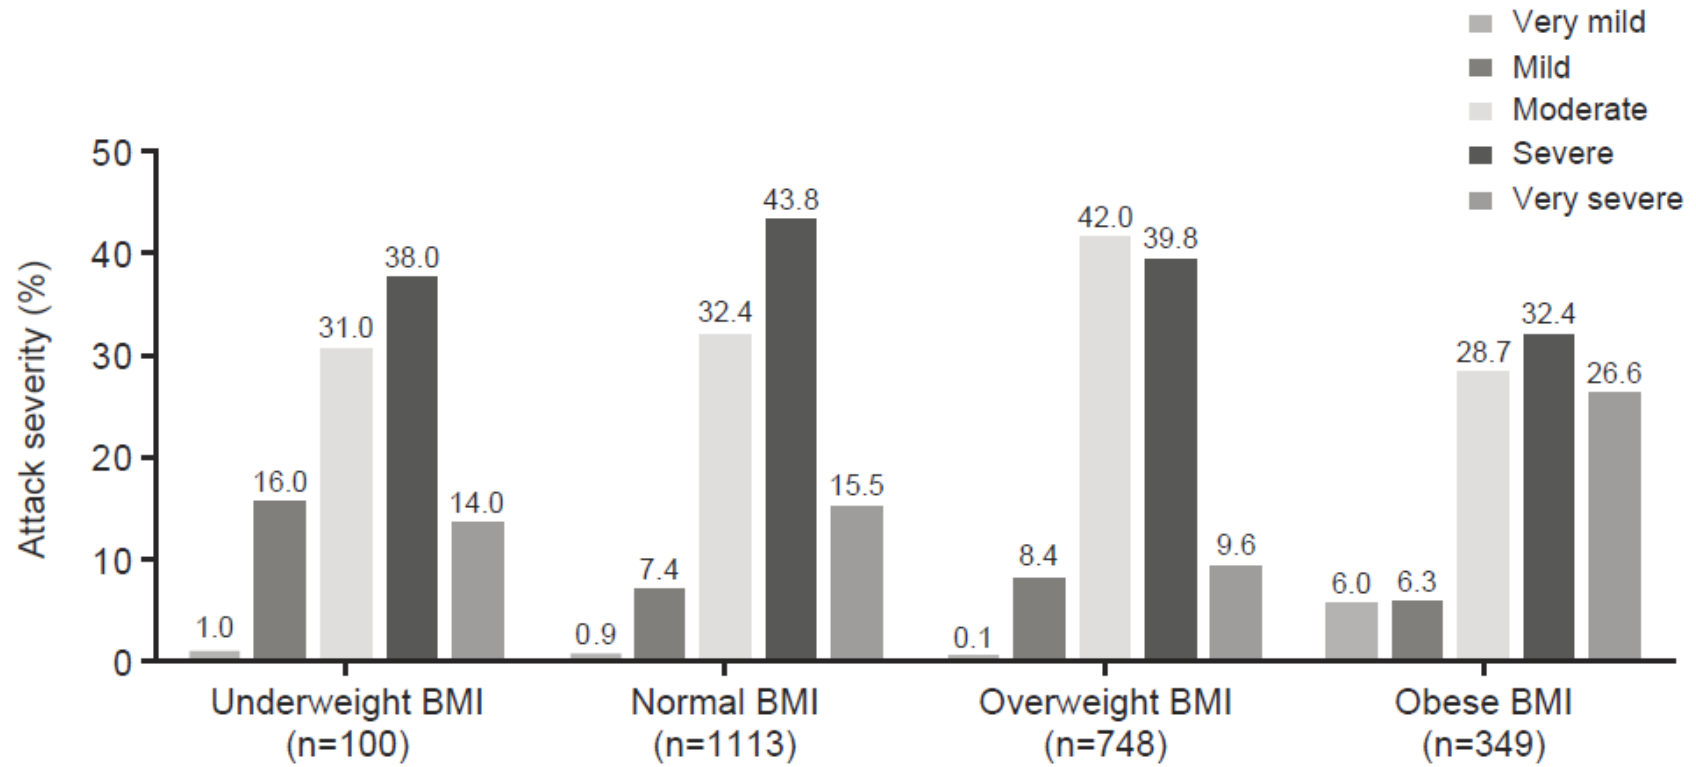

**Figure S2.**

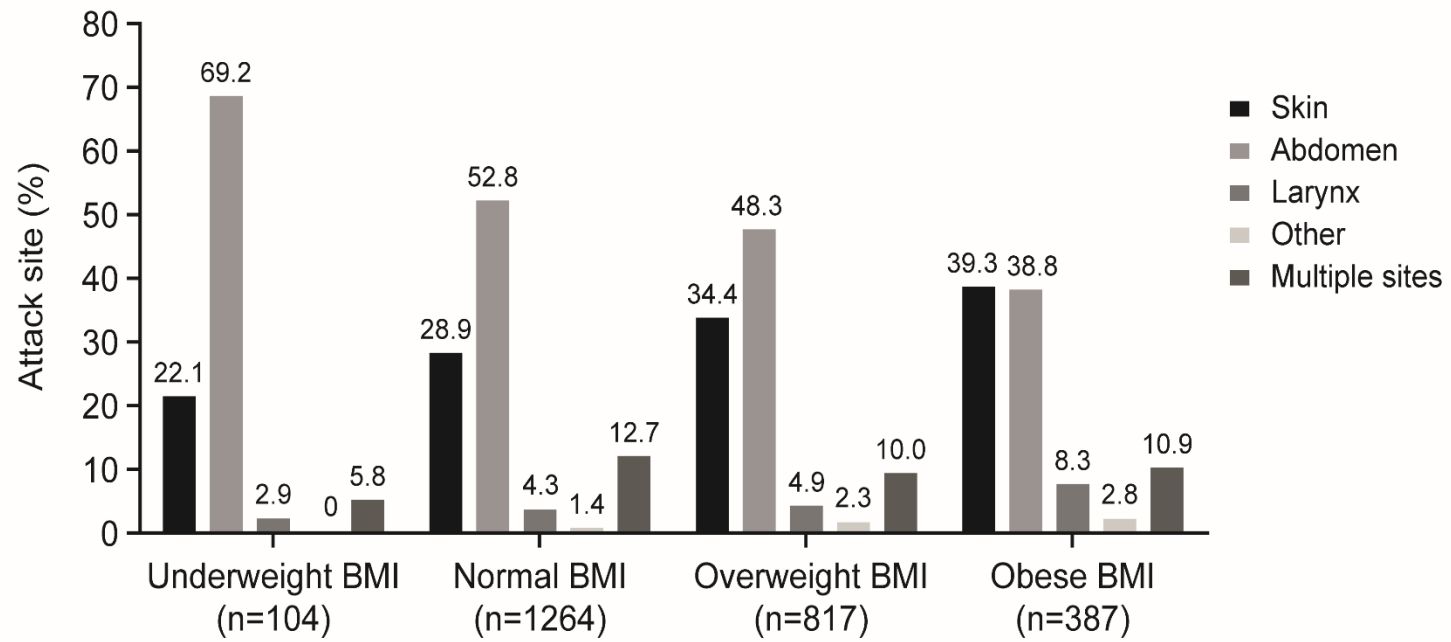

Figure S3.

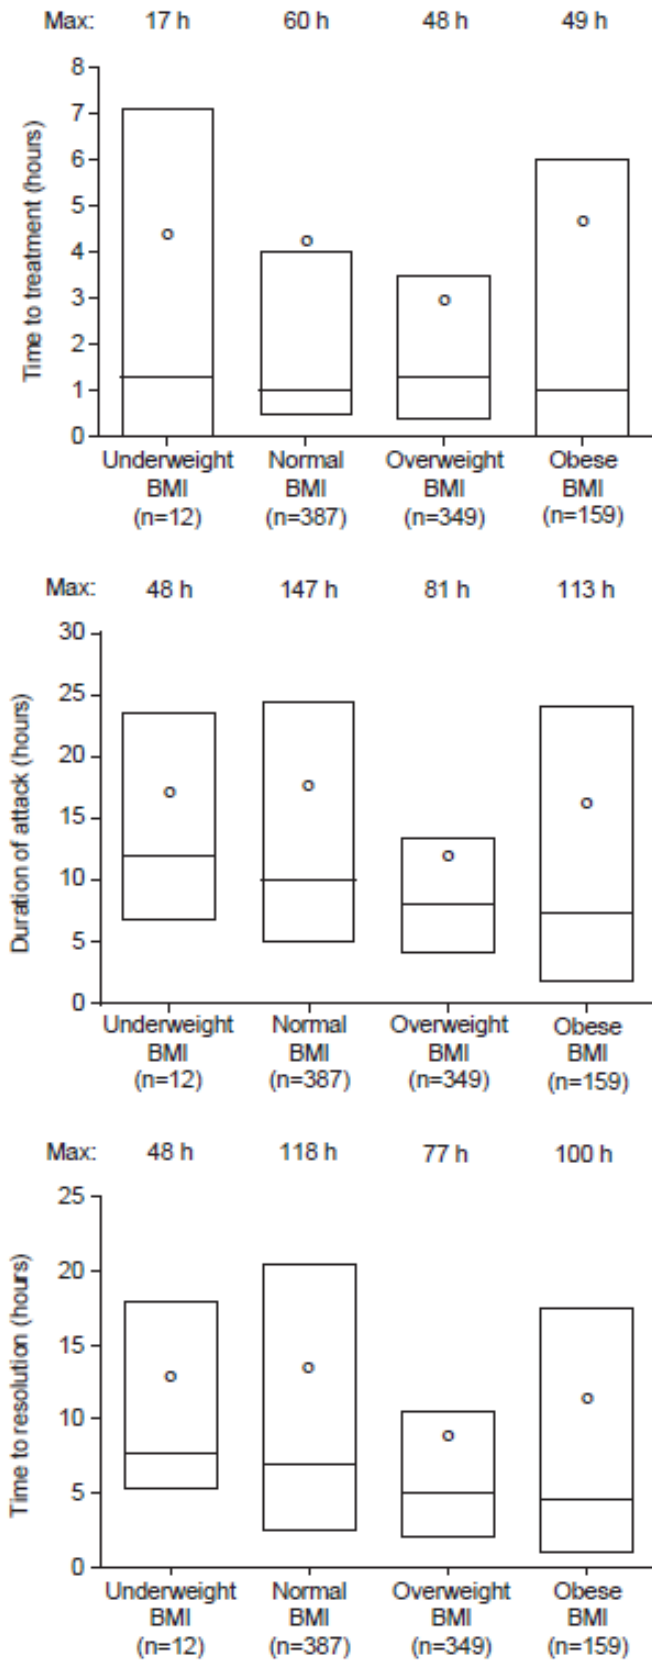

Supplement: MOESM1 [file 15560528]
